# Supplementary material for: Breakfast in Canada: Prevalence of Consumption, Contribution to Nutrient and Food Group Intakes, and Variability across Tertiles of Daily Diet Quality. A Study from the International Breakfast Research Initiative
Source: Nutrients. 2018 Jul 27;10(8):985. doi: 10.3390/nu10080985 (PMC6116091; doi:10.3390/nu10080985)
Supplement: Supplementary file 1 [file nutrients-10-00985-s001.pdf]

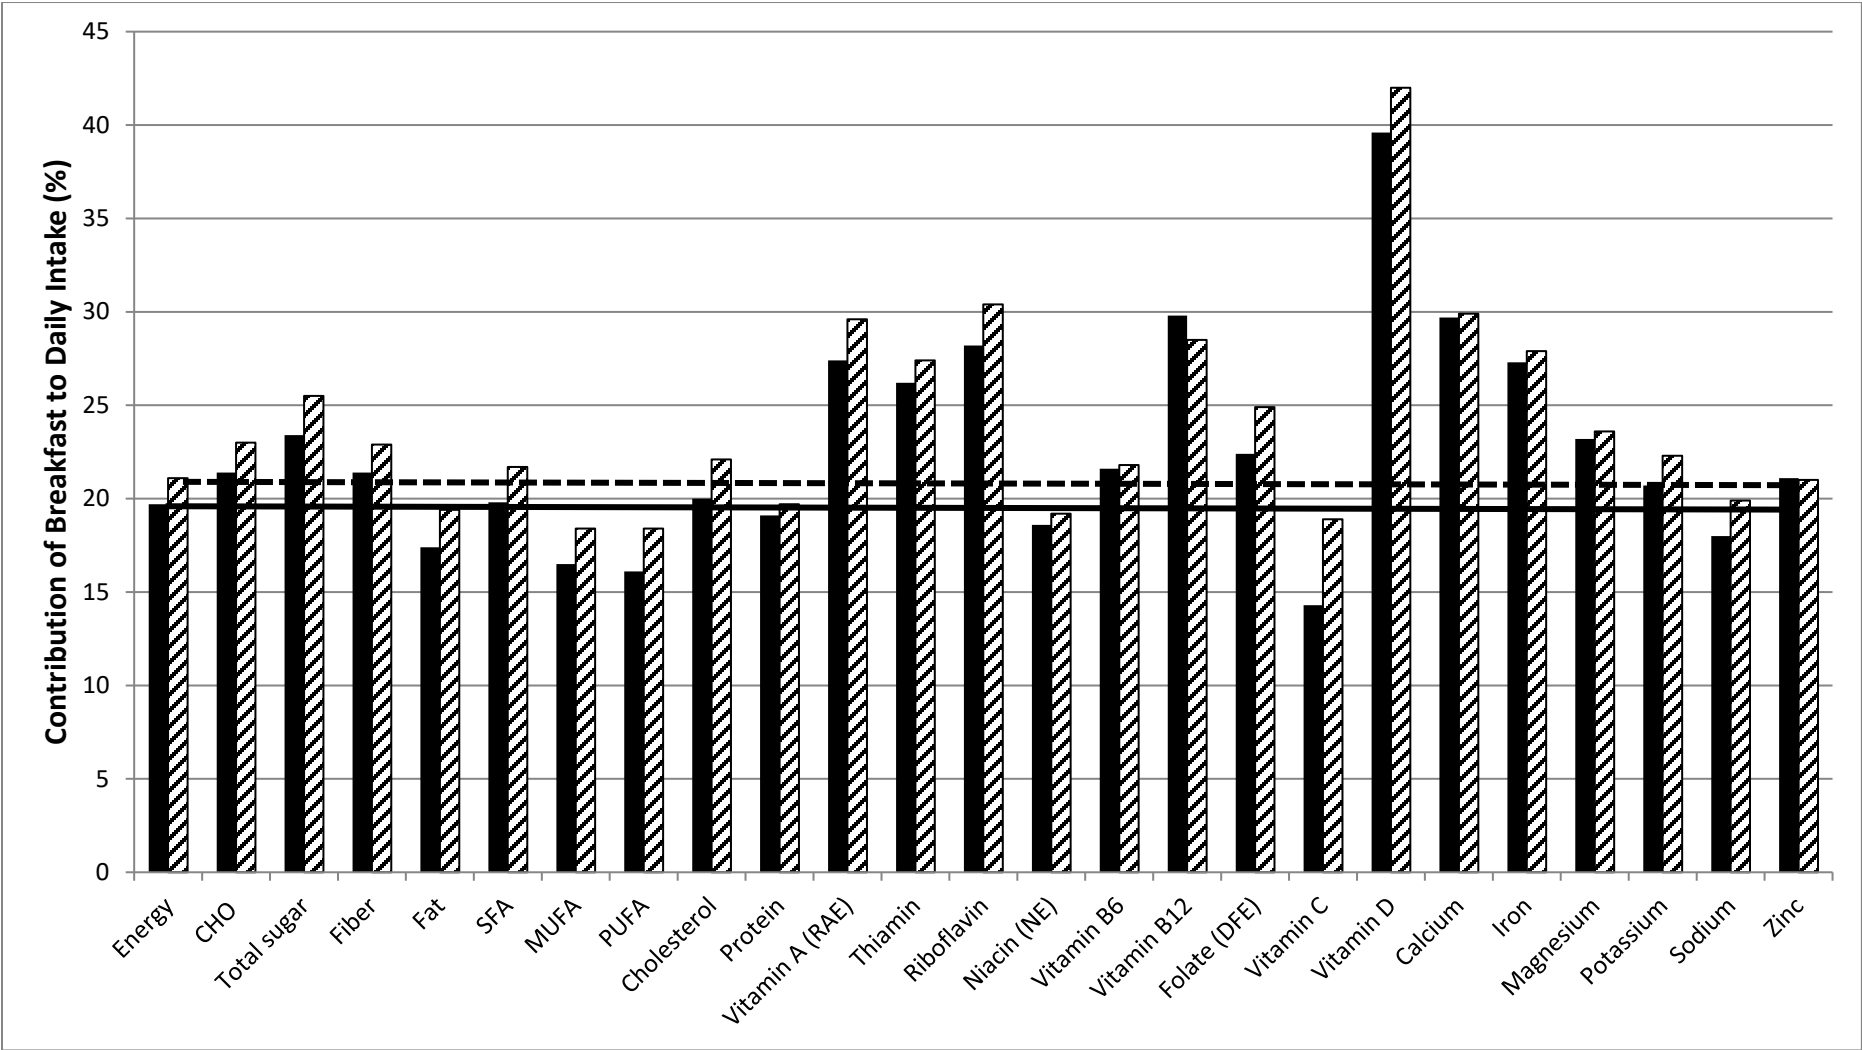

**Figure S1.** Contribution of nutrient intakes at breakfast to total daily intakes of Canadian children (6–12 y, 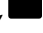) and adolescent (13–17 y, 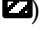) breakfast consumers. The horizontal lines represent the percentage of daily energy intake consumed at breakfast.

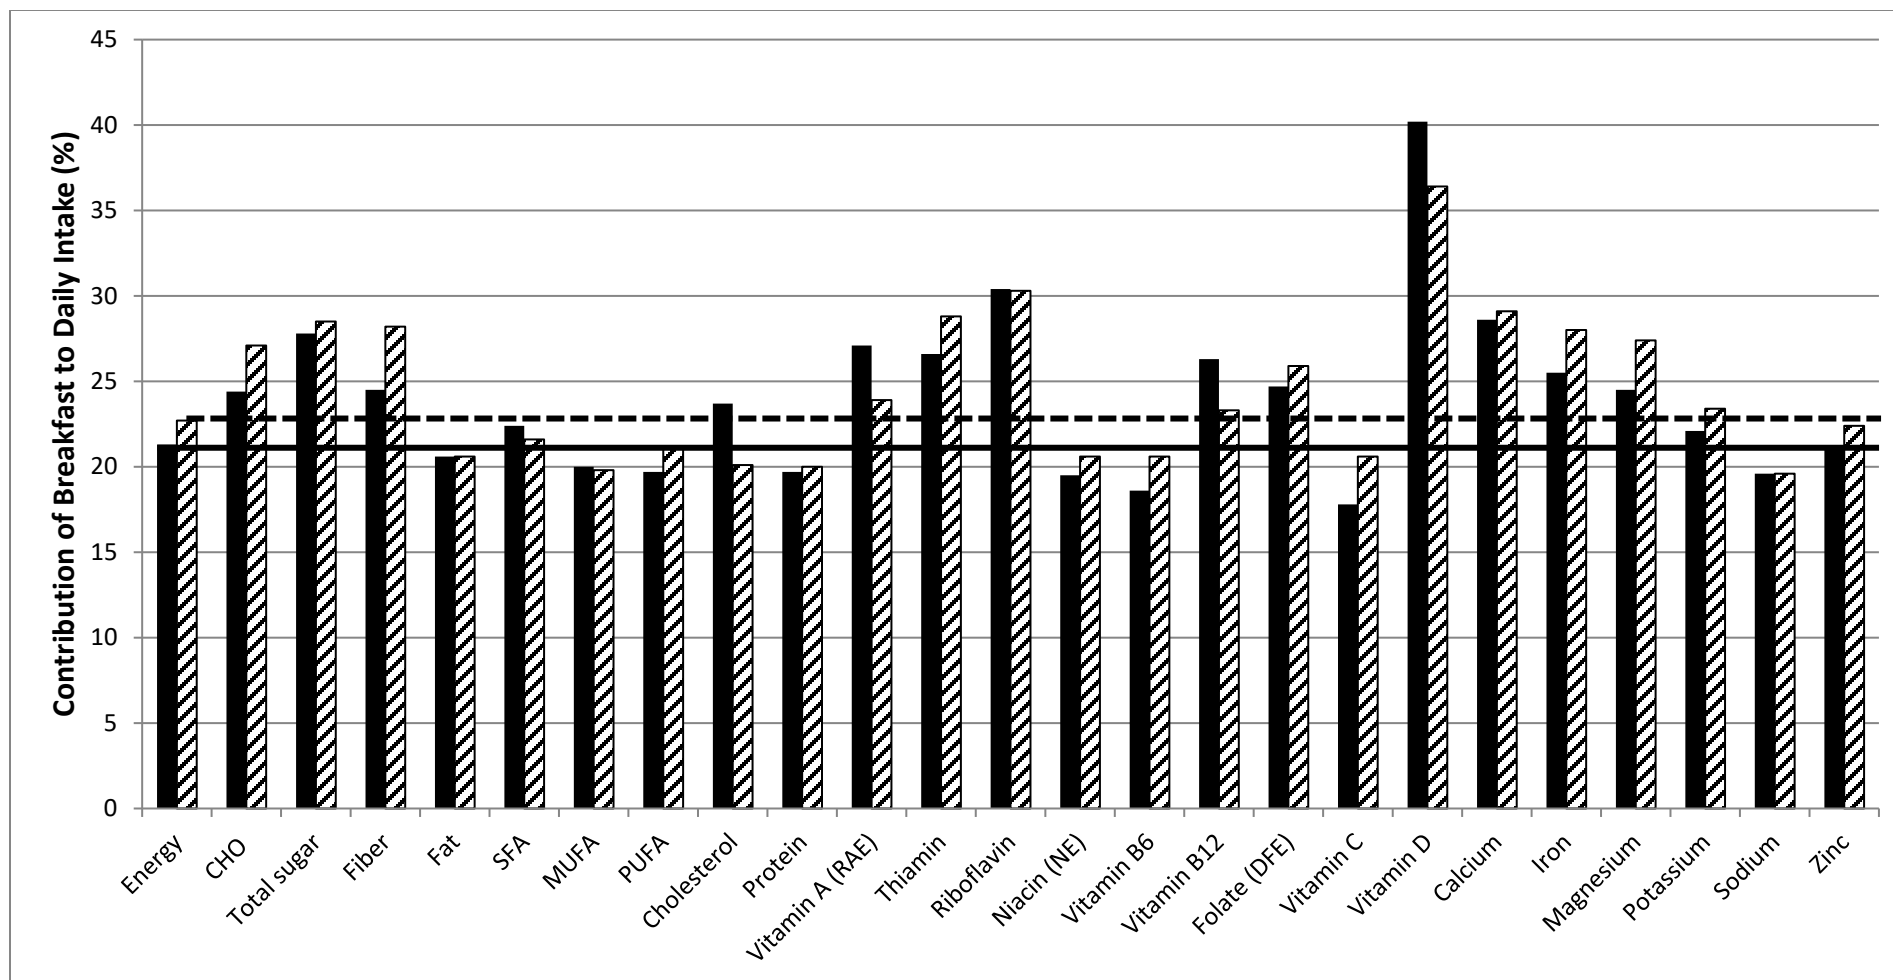

**Figure S2.** Contribution of nutrient intakes at breakfast to total daily intakes of Canadian younger (18–54 y, 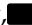) and older (55+ y, 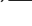) adult breakfast consumers . The horizontal lines represent the proportion of daily energy intake consumed at breakfast.

**Table S1.** Proportions consuming food groups at breakfast and mean percentages of breakfast energy and nutrient intakes from food groups.

| Food Group                            | Percent Consumers       | Percentage of Breakfast Energy or Nutrient Intake |              |         |       |        |       |       |      |      |      |      |      |
|---------------------------------------|-------------------------|---------------------------------------------------|--------------|---------|-------|--------|-------|-------|------|------|------|------|------|
|                                       |                         | Energy                                            | Total sugars | Sat fat | Fiber | Folate | Vit A | Vit D | Ca   | Fe   | Na   | K    | Mg   |
| Children and Teens (6–17 y, n = 3934) |                         |                                                   |              |         |       |        |       |       |      |      |      |      |      |
| Fruit juice                           | 14.1 ± 0.8 <sup>1</sup> | 3.9                                               | 7.2          | 0.7     | 3.5   | 3.9    | 2.6   | 0.4   | 3.1  | 2.0  | 0.7  | 7.0  | 4.7  |
| Whole fruit                           | 19.0 ± 1.0              | 4.9                                               | 7.9          | 2.0     | 9.8   | 5.0    | 4.2   | 0.0   | 2.5  | 3.9  | 1.1  | 7.6  | 5.4  |
| Whole grains                          | 29.7 ± 1.1              | 10.0                                              | 6.1          | 5.8     | 17.2  | 13.0   | 0.2   | 2.0   | 5.6  | 17.2 | 9.4  | 5.8  | 10.7 |
| Non-whole grains                      | 60.6 ± 1.2              | 24.6                                              | 16.9         | 10.5    | 39.2  | 37.2   | 4.5   | 10.4  | 14.3 | 40.0 | 30.0 | 13.4 | 21.8 |
| Milk and Alternatives                 | 67.1 ± 1.2              | 21.2                                              | 29.4         | 38.5    | 1.8   | 11.8   | 50.1  | 50.8  | 45.5 | 4.2  | 21.3 | 35.2 | 25.4 |
| Meat and Alternatives                 | 25.2 ± 1.1              | 6.8                                               | 2.8          | 10.0    | 2.8   | 7.2    | 6.4   | 6.4   | 3.9  | 6.9  | 5.2  | 6.2  | 6.2  |
| Other Foods                           | 59.2 ± 1.2              | 9.8                                               | 11.2         | 16.3    | 3.2   | 1.5    | 13.6  | 10.1  | 5.5  | 4.5  | 10.5 | 4.7  | 5.4  |
| Total                                 | n/a                     | 80.9                                              | 81.6         | 83.9    | 77.6  | 79.5   | 81.6  | 80.1  | 80.3 | 78.7 | 78.3 | 79.9 | 79.7 |
| Adults (18+ y, n = 12,550)            |                         |                                                   |              |         |       |        |       |       |      |      |      |      |      |
| Fruit juice                           | 12.0 ± 0.6              | 2.8                                               | 5.5          | 0.5     | 2.2   | 3.5    | 2.2   | 0.8   | 2.5  | 1.5  | 0.4  | 4.9  | 3.1  |
| Whole fruit                           | 29.1 ± 0.8              | 7.9                                               | 13.5         | 3.3     | 14.5  | 8.5    | 7.4   | 0.0   | 3.9  | 6.0  | 1.5  | 11.3 | 7.9  |
| Whole grains                          | 32.1 ± 0.8              | 9.4                                               | 4.3          | 6.5     | 15.2  | 9.9    | 0.6   | 0.7   | 5.0  | 15.1 | 6.8  | 5.4  | 10.1 |
| Non-whole grains                      | 53.9 ± 0.9              | 21.2                                              | 15.0         | 9.6     | 34.8  | 30.6   | 2.3   | 10.6  | 15.6 | 33.4 | 25.8 | 11.1 | 19.8 |
| Milk and Alternatives                 | 60.0 ± 1.0              | 13.0                                              | 18.0         | 24.9    | 1.1   | 7.0    | 35.2  | 36.3  | 32.1 | 2.6  | 15.9 | 16.7 | 11.9 |
| Meat and Alternatives                 | 36.7 ± 1.0              | 9.6                                               | 3.9          | 14.4    | 4.8   | 9.3    | 8.5   | 9.0   | 5.9  | 9.3  | 7.1  | 8.1  | 8.6  |
| Other Foods                           | 68.8 ± 0.9              | 14.1                                              | 17.5         | 21.1    | 2.6   | 2.0    | 21.0  | 16.8  | 7.7  | 4.3  | 14.2 | 4.9  | 5.2  |
| Total                                 | n/a                     | 77.9                                              | 77.7         | 80.3    | 75.1  | 70.7   | 77.2  | 74.2  | 72.6 | 72.3 | 71.9 | 62.5 | 66.6 |

<sup>1</sup> Data for percent consumers are shown as mean percentages ± Standard Error (SE); data for energy and nutrients are shown as mean percentages of breakfast intake. SEs for the percentage of nutrient intake provided by each of the food groups at breakfast were all <0.1% and so are not displayed.

**Table S2.** Sociodemographic and lifestyle characteristics of children/teen and adult breakfast consumers by daily Nutrient Rich Food index 9.3 tertile<sup>1,2</sup>.

| Characteristic                            | Children/teens (6–17y; n = 3934) |                   |                   |        | Adults (≥18y; n = 12,550) |                   |                   |        |
|-------------------------------------------|----------------------------------|-------------------|-------------------|--------|---------------------------|-------------------|-------------------|--------|
|                                           | 1 (low)                          | 2 (middle)        | 3 (high)          | P      | 1 (low)                   | 2 (middle)        | 3 (high)          | P      |
|                                           | Mean or<br>% ± SE                | Mean or<br>% ± SE | Mean or<br>% ± SE |        | Mean or<br>% ± SE         | Mean or<br>% ± SE | Mean or<br>% ± SE |        |
| Mean age (y)                              | 11.7 ± 0.1                       | 11.5 ± 0.1        | 10.9 ± 0.1        | 0.001  | 47.8 ± 0.4                | 48.5 ± 0.5        | 52.7 ± 0.4        | <0.001 |
| Sex (% Female)                            | 47.5 ± 2.0                       | 52.0 ± 2.0        | 46.0 ± 2.3        | 0.167  | 42.6 ± 1.4                | 50.3 ± 1.4        | 60.0 ± 1.2        | <0.001 |
| Sex (% male)                              | 52.5 ± 2.0                       | 48.0 ± 2.0        | 54.0 ± 2.3        | 0.167  | 57.4 ± 1.4                | 49.7 ± 1.4        | 40.0 ± 1.2        | <0.001 |
| Ethnicity (% Caucasian)                   | 69.9 ± 2.3                       | 64.0 ± 2.6        | 69.4 ± 2.2        | 0.128  | 79.0 ± 1.4                | 72.4 ± 1.7        | 73.2 ± 1.5        | 0.001  |
| Supplement use (% yes)                    | 34.5 ± 2.0                       | 35.7 ± 2.1        | 39.8 ± 2.3        | 0.188  | 38.9 ± 1.5                | 47.9 ± 1.5        | 57.4 ± 1.5        | <0.001 |
| Smoker (% yes)                            | 3.9 ± 0.8                        | 1.3 ± 0.6         | 1.1 ± 0.6         | 0.013  | 23.5 ± 1.4                | 15.9 ± 1.2        | 10.0 ± 0.8        | <0.001 |
| Education (% university grad)             | 35.5 ± 2.2                       | 47.2 ± 2.4        | 49.8 ± 2.3        | <0.001 | 32.3 ± 1.5                | 41.8 ± 1.7        | 43.9 ± 1.5        | <0.001 |
| Marital status (% married/cohabiting)     | --                               | --                | --                | n/a    | 62.1 ± 1.5                | 64.5 ± 1.5        | 66.9 ± 1.4        | 0.076  |
| Food secure (% yes)                       | 78.3 ± 2.0                       | 83.2 ± 1.7        | 88.8 ± 1.3        | <0.001 | 85.7 ± 1.1                | 90.2 ± 0.9        | 91.9 ± 0.8        | <0.001 |
| Body mass index (BMI; kg/m <sup>2</sup> ) | --                               | --                | --                | n/a    | 27.8 ± 0.2                | 27.0 ± 0.2        | 26.9 ± 0.2        | 0.002  |
| BMI z-score                               | 0.49 ± 0.07                      | 0.44 ± 0.07       | 0.39 ± 0.07       | 0.598  | --                        | --                | --                | n/a    |
| Overweight/obese (% yes)                  | 30.8 ± 2.1                       | 31.0 ± 2.2        | 30.2 ± 2.4        | 0.968  | 63.9 ± 1.8                | 59.9 ± 1.9        | 59.0 ± 1.7        | 0.113  |
| Urban residence (% yes)                   | 77.8 ± 2.0                       | 80.6 ± 1.9        | 85.1 ± 1.6        | 0.010  | 80.9 ± 1.2                | 84.1 ± 1.3        | 83.9 ± 1.2        | 0.087  |
| Immigrant to Canada (% yes)               | 11.4 ± 1.5                       | 11.4 ± 1.5        | 8.5 ± 1.3         | 0.293  | 23.2 ± 1.4                | 28.1 ± 1.5        | 33.3 ± 1.5        | <0.001 |
| Daily energy intake (kcal)                | 2153 ± 38                        | 1967 ± 36         | 1786 ± 29         | <.0001 | 2084 ± 28                 | 1943 ± 27         | 1662 ± 21         | <0.001 |
| Breakfast energy intake (kcal)            | 386 ± 12                         | 392 ± 11          | 368 ± 9           | 0.288  | 390 ± 10                  | 400 ± 9           | 381 ± 10          | 0.280  |

<sup>1</sup> The Nutrient Rich Food index 9.3 score reflects the sum of daily intakes (expressed as percentages of Canadian Daily Values (DVs) normalized to an intake of 2000 kcal) of 9 nutrients to encourage (protein, fiber, vitamins A, C, and D, calcium, iron, magnesium, and potassium) minus the sum of the percentages by which intakes of the 3 nutrients to limit (total sugars, saturated fat, and sodium) exceed the DV. Higher scores reflect higher diet quality. <sup>2</sup> Data are shown as unadjusted means ± SE or proportions ± SE and are weighted to the Canadian population. Samples sizes are not weighted.
